# Supplementary material
Source: publisher site journal article supplement (https://www.dovepress.com/article/306394)
Supplement: Supplementary file 1 [file get_supplementary_file.php]

**Appendix A - Pre-course questionnaire:**

1. Which medical school did you attend for your pre-clinical years?
2. Which medical school did you attend for your clinical years?
3. Student type
4. Course type
5. Current year of medical school
6. What is your highest qualification to date?
7. Age
8. Sex
9. Have you had an interview in-person when applying to university to study medicine?
10. How many medical school interviews did you attend?
11. When was the last time you attended a medicine/science -related interview in-person? (e.g. internship/project/scholarship/degree interview)
12. How may formal online interviews have you had in your life?
13. How confident do you feel about your performance in interviews conducted in-person?
14. How confident do you feel about your performance in interviews conducted online?
15. Have you ever read any guides (books/blogs/online guides) on how to maximise your performance at interviews in-person?
16. Have you ever read any guides (books/blogs/online guides) on how to maximise your performance at interviews online?
17. Have you ever attended any courses on how to excel at interviews in-person?
18. Have you ever attended any courses on how to excel at online interviews? (excluding High Yield AFP)
19. Have you received any training from your medical school on how to excel at online interviews?
20. To what extent would you rather have an AFP interview in-person than online?
21. To what extent is the online format of the AFP interview affecting your anxiety about doing well in the application process?
22. To what extent does the online format of the AFP interviews this year impact on your confidence with regards to doing well?
23. To what extent do you think the online format of the AFP interviews is likely to affect your overall performance?
24. To what extent are you worried about the online format affecting your overall score?
25. If you do not get an offer to do an AFP job, to what extent do you think that the online format could be a contributor?
26. How confident do you feel about the amount and detail of the information that you have received from the deanery about the online format of the interviews?
27. Have you been notified whether the AFP interviews will take place on Zoom/Microsoft Teams/Skype/another remote platform?
28. Not knowing the software that we will be using and whether I am familiar with it impacts on my anxiety levels.
29. Are you potentially worried about any of the following factors when thinking about your online AFP interview? Tick all boxes that apply to you: Quality of the internet connection; surrounding noises (family, neighbours etc.); speaking in parallel/interrupting; obstacles resulting from my unfamiliarity with the software; obstacles resulting from the interviewers’ unfamiliarity with the software; body language; more difficult to convey my personality
30. Is there anything else that you are worried about regarding the online AFP interview format?
31. Can you think of any advantages to yourself of the AFP interviews being conducted online?

**Appendix B -** **Items for the Measure of Anxiety in Selection Interviews (MASI), adapted to an online interview format:**

**D1: Communication Anxiety**

1. I think that I may become so apprehensive in my online AFP interview that I will be unable to express my thoughts clearly
2. I think that I will become so anxious during the online AFP interview that I will have trouble answering questions that I know
3. During my online AFP interview, I am worried I won't be able to think of a thing to say
4. I feel that my verbal communication skills are strong enough to succeed in an online AFP interview (*)
5. Thinking about my online AFP interview, I am worried I will find it hard to understand what the interviewer is asking me
6. I think I will find it easy to communicate my personal accomplishments during an online AFP interview (*)

**D2: Appearance Anxiety**

1. I am likely to feel uneasy about my appearance when I am being interviewed and I see my own image on the screen
2. Before interviews I am so nervous that I spend an excessive amount of time on my appearance
3. In interviews, I worry that the interviewer will focus on what I consider to be my least attractive physical features
4. Seeing my own images on the screen and noticing that I may not look my absolute best, I may find it very hard to be relaxed
5. I may feel uneasy if my hair is not perfect when I see it on the computer screen while starting an interview
6. During an interview, I worry about whether I have dressed appropriately

**D3: Social Anxiety**

1. While thinking about my online AFP interview, I am concerned that my future interviewer will perceive me as socially awkward
2. I become very uptight about the thought of having to socially interact with an AFP interviewer online and having to initiate the dialogue
3. I am worried about what kind of personal impression I will make online on my future AFP interviewers
4. When thinking about the online AFP interview, I worry that my actions/gestures/body language will not be considered socially appropriate
5. I worry about whether my AFP interviewers will like me as a person, given that the interaction will be online
6. When thinking about my online AFP interview, I worry how to start the meeting/introduce myself (considering that I cannot use a handshake/will have to use an online waiting room etc.)

**D4: Performance Anxiety**

1. I am very nervous that my performance in the online AFP interview will not be good enough
2. I am overwhelmed by thoughts of doing poorly when I will be in the online AFP interview
3. I worry that my online AFP interview performance will be lower than that of other applicants, who may be more experienced in the online format
4. During my online AFP interview, it is likely that I will be so troubled by thoughts of failing that my performance will be reduced
5. During the online AFP interview, I will worry about what will happen if I don't get into the academic programme
6. While taking an online AFP interview, I am likely to worry about whether I am a good enough candidate to pursue academic medicine

**D5: Behavioural Anxiety**

1. During interviews, my hands shake
2. My heartbeat is faster than usual during interviews
3. It is hard for me to avoid fidgeting during interviews
4. Interviews often make me perspire (e.g., sweaty palms and underarms)
5. My mouth gets very dry during interviews
6. I often feel sick to my stomach when I am interviewed for a position that I care about

Note: (*) indicates a negatively keyed item. Items are rated on a 5-point scale unless indicated otherwise, where 1 = strongly disagree and 5 = strongly agree.

**Appendix C – Post-course questionnaire (including post-course MASI):**

1. Which medical school did you attend for your pre-clinical years?
2. Which medical school did you attend for your clinical years?
3. Student type
4. Course type
5. Current year of medical school
6. What is your highest qualification to date?
7. Age
8. Sex
9. How confident do you feel about your performance in interviews conducted in person?
10. How confident do you feel about your performance in interviews conducted online?
11. To what extent would you rather have an AFP interview in person than online?
12. To what extent is the online format of the AFP interview affecting your anxiety about doing well in the application process?
13. To what extent does the online format of the AFP interviews this year impact on your confidence with regards to doing well?
14. To what extent do you think the online format of the AFP interviews is likely to affect your overall performance?
15. To what extent are you worried about the online format affecting your overall score?
16. If you do not get an offer to do an AFP job, to what extent do you think that the online format could be a contributor?
17. I think that being able to re-watch my own online High Yield AFP interview video will be beneficial to my performance in the real AFP interview.
18. I think that I may become so apprehensive in my online AFP interview that I will be unable to express my thoughts clearly.
19. I think that I will become some anxious during the online AFP interview that I will have trouble answering questions that I know.
20. During my online AFP interview, I am worried I won’t be able to think of a thing to say.
21. I feel that my verbal communication skills are strong enough to succeed in an online AFP interview.
22. Thinking about my online AFP interview, I am worried I will find it hard to understand what the interviewer is asking me.
23. I think I will find it easy to communicate my personal accomplishments during an online AFP interview.
24. I am likely to feel uneasy about my appearance when I am being interviewed and I see my own image on the screen.
25. Before interviews I am so nervous that I spend an excessive amount of time on my appearance.
26. In interviews, I worry that the interviewer will focus on what I consider to be my least attractive physical features.
27. Seeing my own images on the screen and noticing that I may not look my absolute best, I may find it very hard to be relaxed.
28. I may feel uneasy if my hair is not perfect when I see it on the computer screen while starting an interview.
29. During an interview, I worry about whether I have dressed appropriately.
30. While thinking about my online AFP interview, I am concerned that my future interviewer will perceive me as socially awkward.
31. I become very uptight about the thought of having to socially interact with an AFP interviewer online and having to initiate the dialogue.
32. I am worried about what kind of personal impression I will make online on my future AFP interviewers.
33. When thinking about the online AFP interview, I worry that my actions/gestures/body language will not be considered socially appropriate.
34. I worry about whether my AFP interviewers will like me as a person, given that the interaction will be online.
35. When thinking about my online AFP interview, I worry how to start the meeting/introduce myself (considering that I cannot use a handshake/will have to use an online waiting room etc.).
36. I am very nervous that my performance in the online AFP interview will not be good enough.
37. I am overwhelmed by thoughts of doing poorly when I will be in the online AFP interview.
38. I worry that my online AFP interview performance will be lower than that of other applicants, who may be more experienced in the online format.
39. During my online AFP interview, it is likely that I will be so troubled by thoughts of failing that my performance will be reduced.
40. During the online AFP interview, I will worry about what will happen if I don't get into the academic programme.
41. While taking an online AFP interview, I am likely to worry about whether I am a good enough candidate to pursue academic medicine.
42. During interviews, my hands shake.
43. My heartbeat is faster than usual during interviews.
44. It is hard for me to avoid fidgeting during interviews.
45. Interviews often make me perspire (e.g., sweaty palms and underarms).
46. My mouth gets very dry during interviews.
47. I often feel sick to my stomach when I am interviewed for a position that I care about.

**Notes:** Data for Appendices A-C were obtained with permission from McCarthy J, Goffin R Measuring Job Interview Anxiety: Beyond Weak Knees and Sweaty Palms. *Personnel Psychology*. 2004;57(3):607-637.18
